# Supplementary material for: Mapping information-rich genotype-phenotype landscapes with genome-scale Perturb-seq
Source: PubMed Central journal article supplement (PMC9380471; doi:10.1016/j.cell.2022.05.013), 2022-06-09

**Data S2. Supplementary Data from investigation of the Integrator complex, related to Figure 3.**

Figure i: Supplementary data related to the functional modules of the Integrator complex, related to Figure 3.

- A) Relationship between Integrator complex members and *C7orf26* in RPE1 cells. Multiple independent sgRNA pairs were used to target *INTS13*, *INTS14*, and *C7orf26*, with independent guides indicated by numbers next to gene names (e.g. *C7orf26*-1, *C7orf26*-2, etc.). The heatmap displays the Pearson correlation between pseudobulk z-normalized gene expression profiles of Integrator complex members. Genetic perturbations are ordered by average linkage hierarchical clustering based on correlation.
- B) SEC trace and full Western blots for purification of a *INTS10*-*INTS13*-*INTS14*-*C7orf26* complex. His-*INTS10*, *INTS13*, *INTS14*, and *C7orf26* were overexpressed in Expi293 cells, affinity purified, and separated via SEC. The *INTS10*-*INTS13*-*INTS14*-*C7orf26* proteins co-fractionated as a higher molecular weight species as visualized by Western blotting.
- C) and D) Identification of differentially expressed genes between Integrator complex modules in K562 cells (C) and RPE1 cells (D). Random forest classifiers were trained on gene expression profiles to classify cells as having perturbation to one of three Integrator complex modules (“endonuclease”, “shoulder and backbone” or “10-13-14-*C7orf26*”). The top 30 gene features led to an accuracy of 97% in K562 cells and 89% in RPE1 cells. Heatmap displays the z-scored gene expression of the top 30 features in each cell type.
- E) Comparison of PRO-seq active RNA polymerase II gene expression profiles across genetic perturbations. PRO-seq reads were aligned to the transcriptome and depth normalized. Heatmap shows the Spearman correlation of expression profiles with biological replicates indicated (e.g. *INTS5\_rep1* and *INTS5\_rep2*).

Figure ii: Integrator biochemistry, related to Figure 3.

- A) Full blots visualizing the effects of CRISPRi-based depletion of Integrator subunits with different probes.
- B) Full blots visualizing *INTS10* pulldown with different probes.
- C) Full blots visualizing Integrator SEC purification with different probes.

Figure iii: Integrator biochemistry in *Drosophila*, related to Figure 3.

- A) Heatmap of results from co-immunoprecipitation of Integrator complex components in *Drosophila*. Heatmaps were generated using average spectral counts resulting from triplicate pulldowns that were each normalized to total spectra.
- B) Volcano plot of enrichments from co-immunoprecipitation using nuclear extract derived from S2 cells stably expressing FLAG-tagged CG5274, which is the *Drosophila* orthologue of *C7orf26*. Enrichment was calculated using spectral counts and significance was determined from three independent purifications.
- C) Co-immunoprecipitation of Integrator complex components in *Drosophila*. Cell lysates were affinity purified and select Integrator proteins were probed by western blot.

Data S2 - Figure i

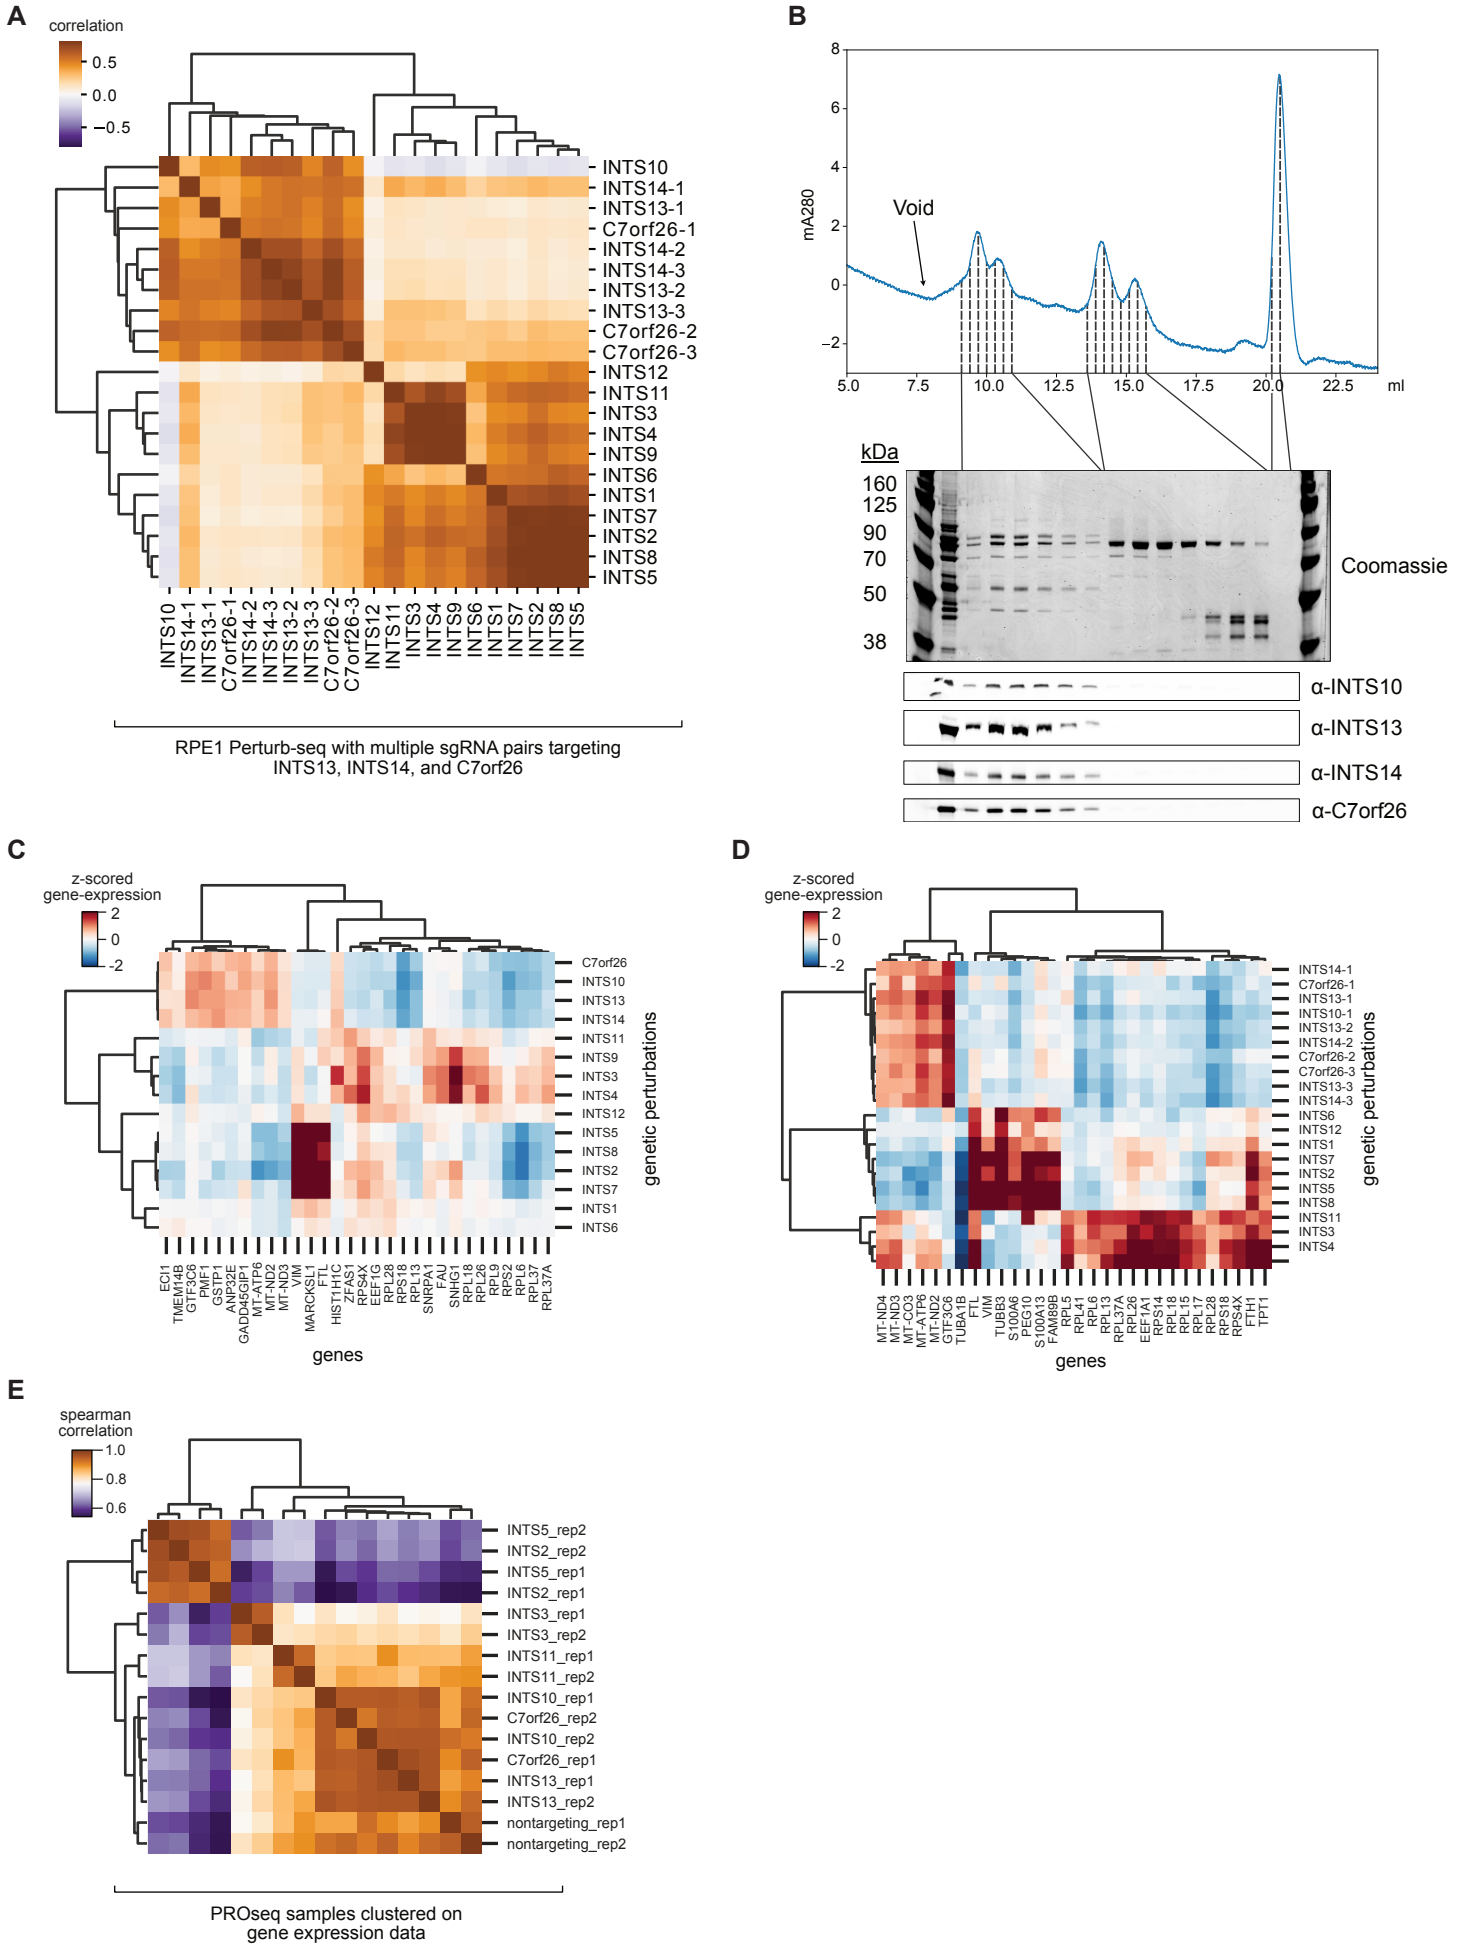

A

Integrator Depletion

α-rabbit secondary  
 Revert® Total Protein  
 Chameleon® Duo Ladder

Samples in order shown  
 in main text figure

Solid Blue: antibody crops  
 Dotted blue: total protein crop

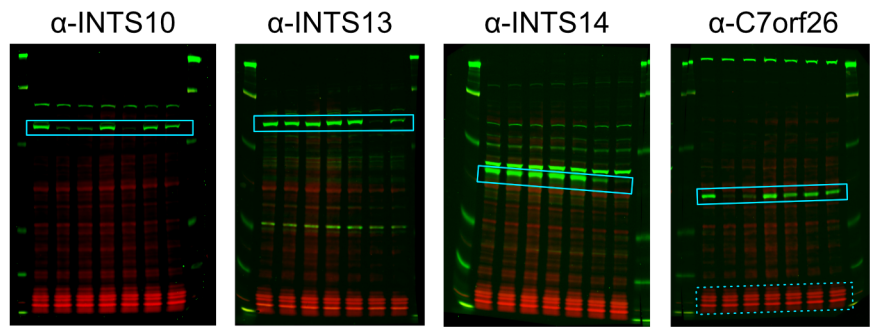

B

Integrator Pulldown

α-rabbit secondary  
 Revert® Total Protein  
 Chameleon® Duo Ladder

Samples in order shown  
 in main text figure

Solid Blue: antibody crops  
 Dotted blue: total protein crop

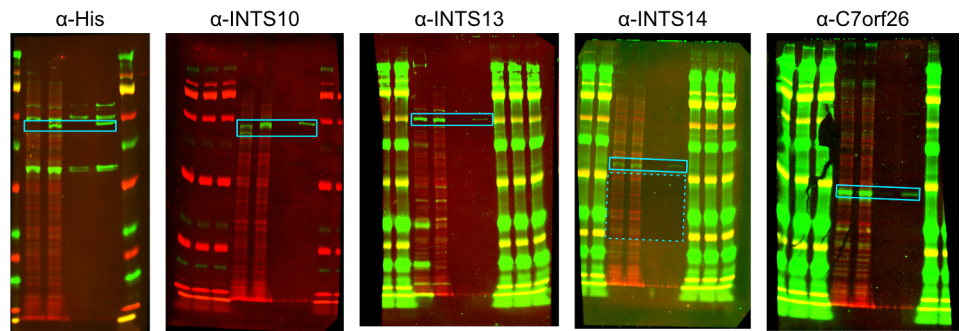

C

Integrator Purification

Readyblue™

α-rabbit secondary  
 Chameleon® Duo Ladder

Samples in order shown  
 in supplementary SEC figure

Solid Blue: main text crops  
 Dotted blue: supplementary crops

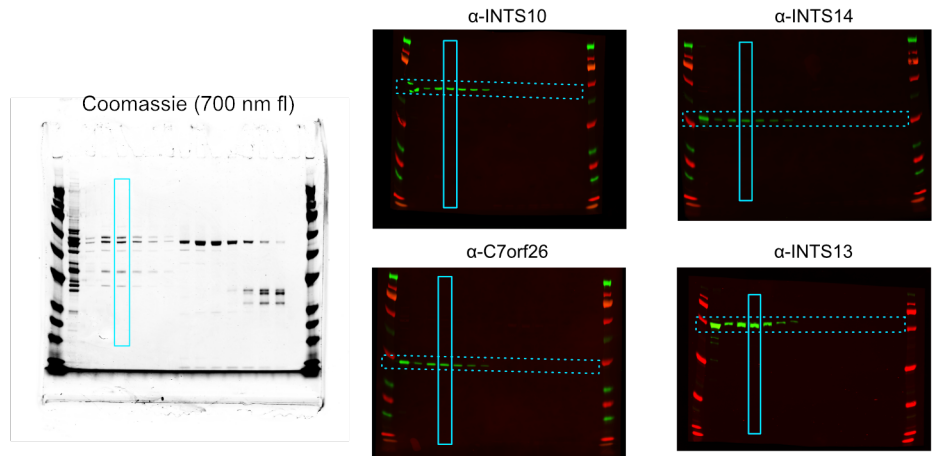

A

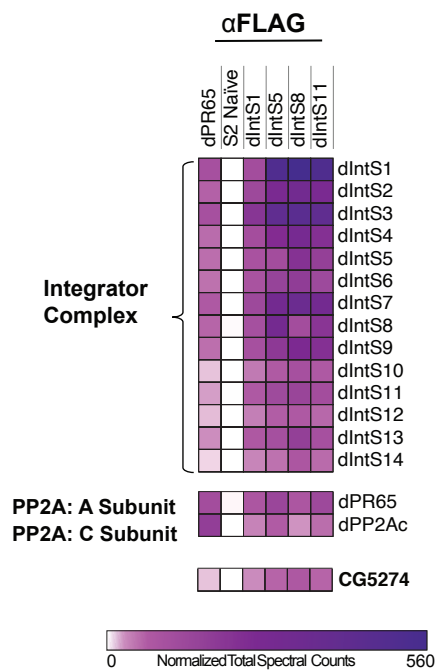

B

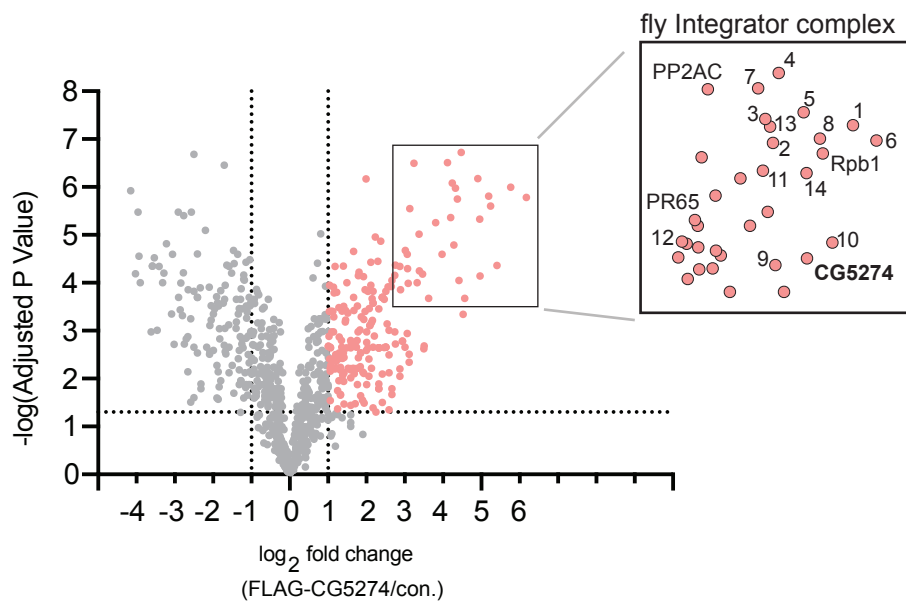

C

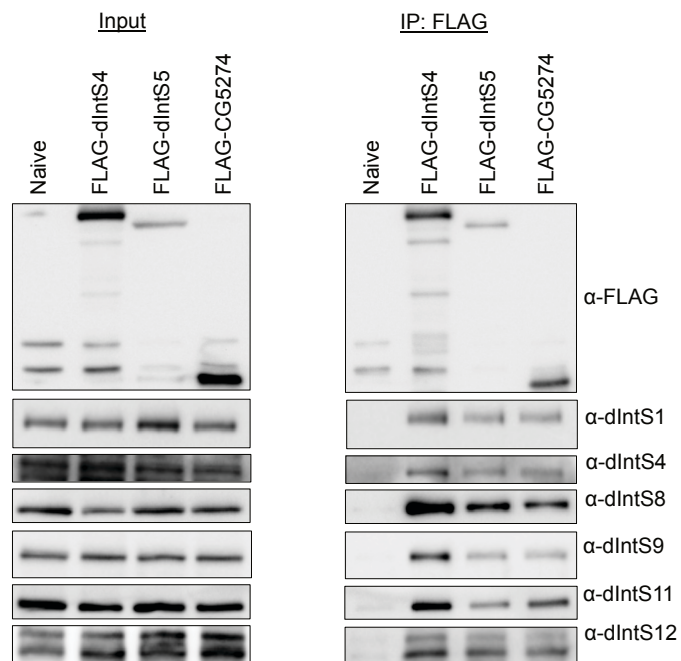

Supplement: NIHMS1812939-supplement-2.pdf [file NIHMS1812939-supplement-2.pdf]
